# Supplementary material for: Utilization of biowaste-derived catalysts for biodiesel production: process optimization using response surface methodology and particle swarm optimization method
Source: Royal Society of Chemistry journal article supplement (doi:10.1039/d2ya00011c), 2022-01-01
Supplement: d2ya00011c1.pdf [file d2ya00011c1.pdf]

## Utilization of Biowaste-derived Catalyst for Biodiesel Production: Process Optimization Using Response Surface Methodology and Particle Swarm Optimization Method

Ikbal Bahar Laskar,<sup>a</sup> Tuhin Deshmukhya,<sup>b</sup> Aayushi Biswas,<sup>c</sup> Bappi Paul,<sup>d</sup> Bishwajit Changmai,<sup>c</sup> Rajat Gupta,<sup>e</sup> and Sushovan Chatterjee<sup>f</sup> and Samuel Lalthazuala Rokhum<sup>c,g</sup>

<sup>a</sup>Department of Mechanical Engineering, Jorhat Engineering College, Jorhat, Assam 785007, India.

<sup>b</sup>Department of Mechanical Engineering, Madanapalle Institute of Technology & Science, Madanapalle, Andhra Pradesh 517325, India.

<sup>c</sup>Department of Chemistry, National Institute of Technology Silchar, Assam 788010, India.

<sup>d</sup>Department of Chemistry, National Institute of Technology Nagaland, Dimapur, Nagaland 797103, India.

<sup>e</sup>Department of Mechanical Engineering, National Institute of Technology Mizoram, Aizawl 796012.

<sup>f</sup>Department of Mechanical Engineering, Cooch Behar Government Engineering College, Cooch Behar, West Bengal 736170, India.

<sup>g</sup>Department of Chemistry, University of Cambridge, Lensfield Road, Cambridge CB2 1EW, UK.

Corresponding author email: [rokhum@che.nits.ac.in](mailto:rokhum@che.nits.ac.in); Tel.: +91 3842 242915; Fax: +91 3842-224797.

### Table of Contents

|                                                                                           |         |
|-------------------------------------------------------------------------------------------|---------|
| XPS core level spectra of Ca, Si, Mg, S, P and Cl of mango pill ash (BFPA) catalyst       | Fig. S1 |
| EDS result of reusable catalyst after 5 <sup>th</sup> cycle                               | Fig. S2 |
| XPS core level spectra of catalyst after 5 <sup>th</sup> cycle Survey, C 1s, O 1s and K2p | Fig. S3 |
| SEM and TEM image of reusable catalyst after 5 <sup>th</sup> cycle                        | Fig. S4 |

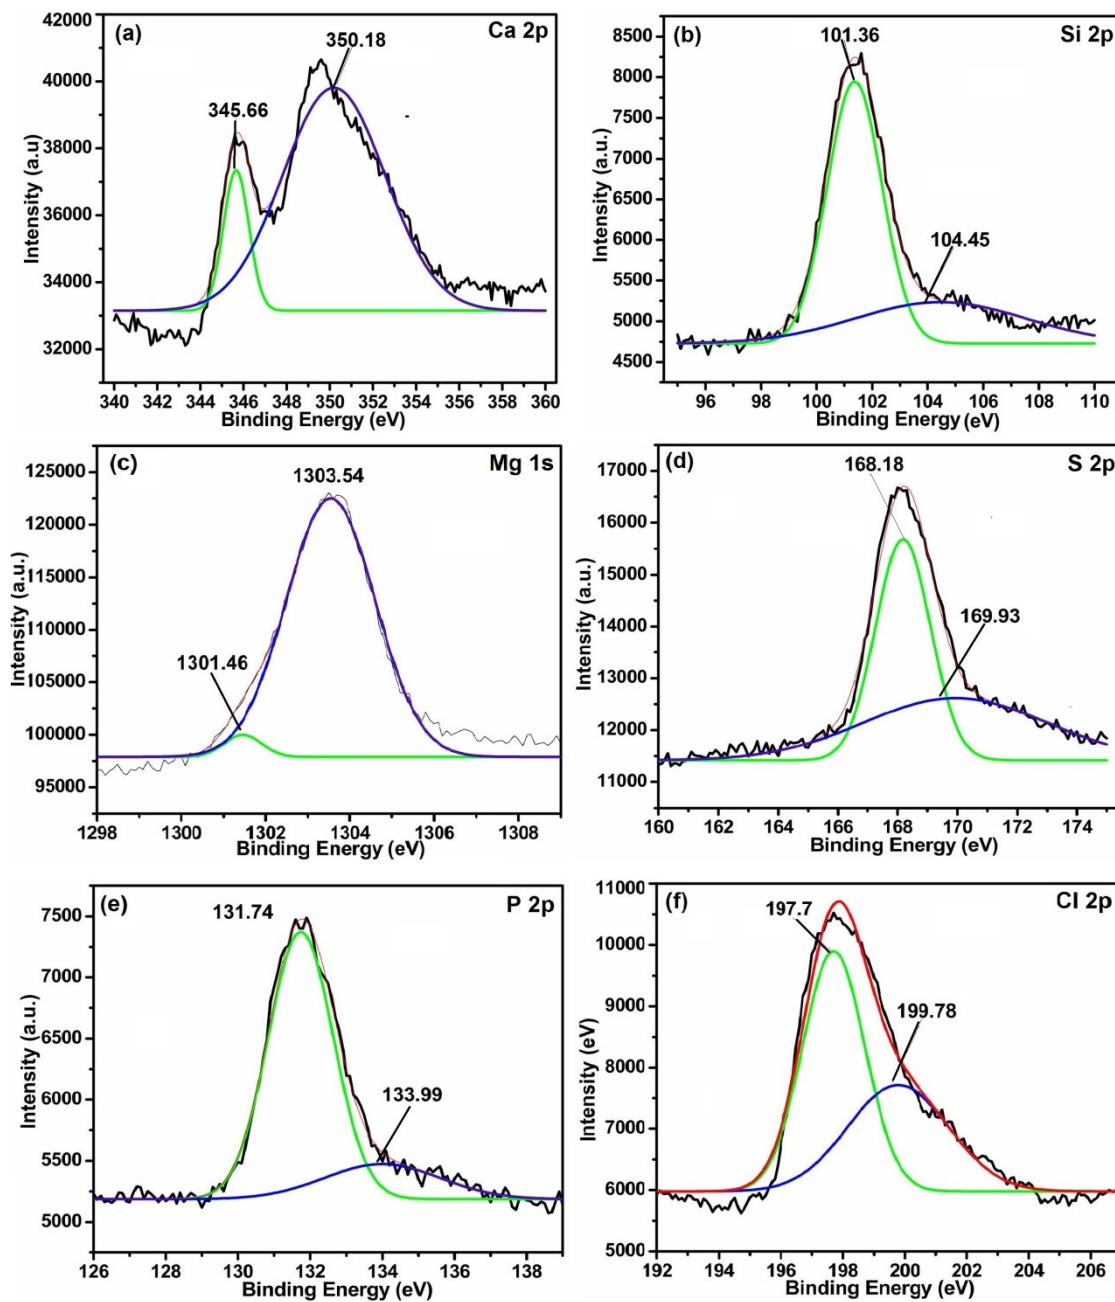

**Fig.S1:** XPS core level spectra of (a) Ca (b) Si (c) Mg (d) S (e) P and (f) Cl

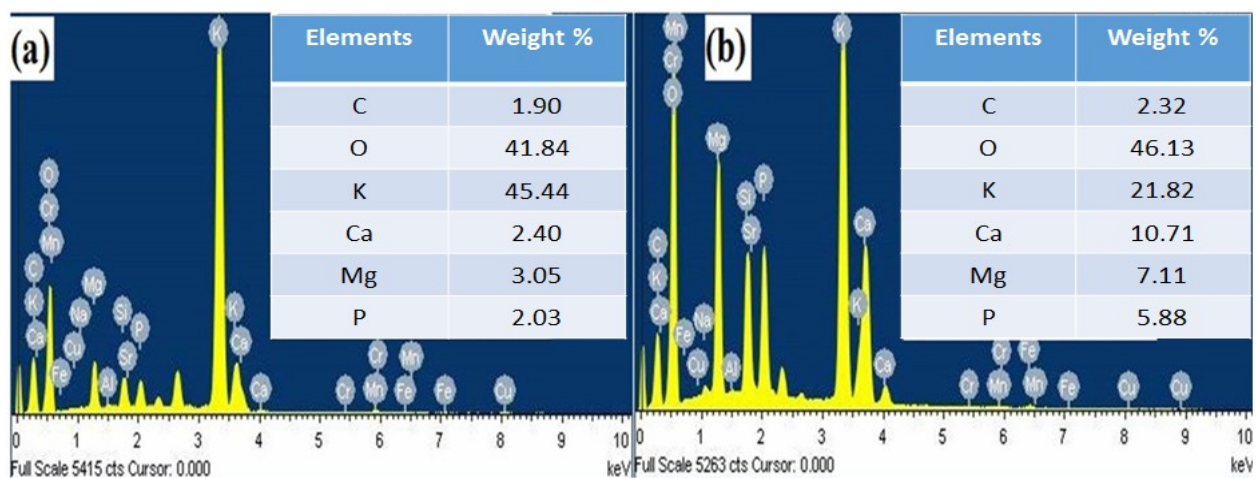

**Fig. S2:** EDS spectra of (a) fresh BFPFA catalyst (b) reused catalyst after 5<sup>th</sup> cycle

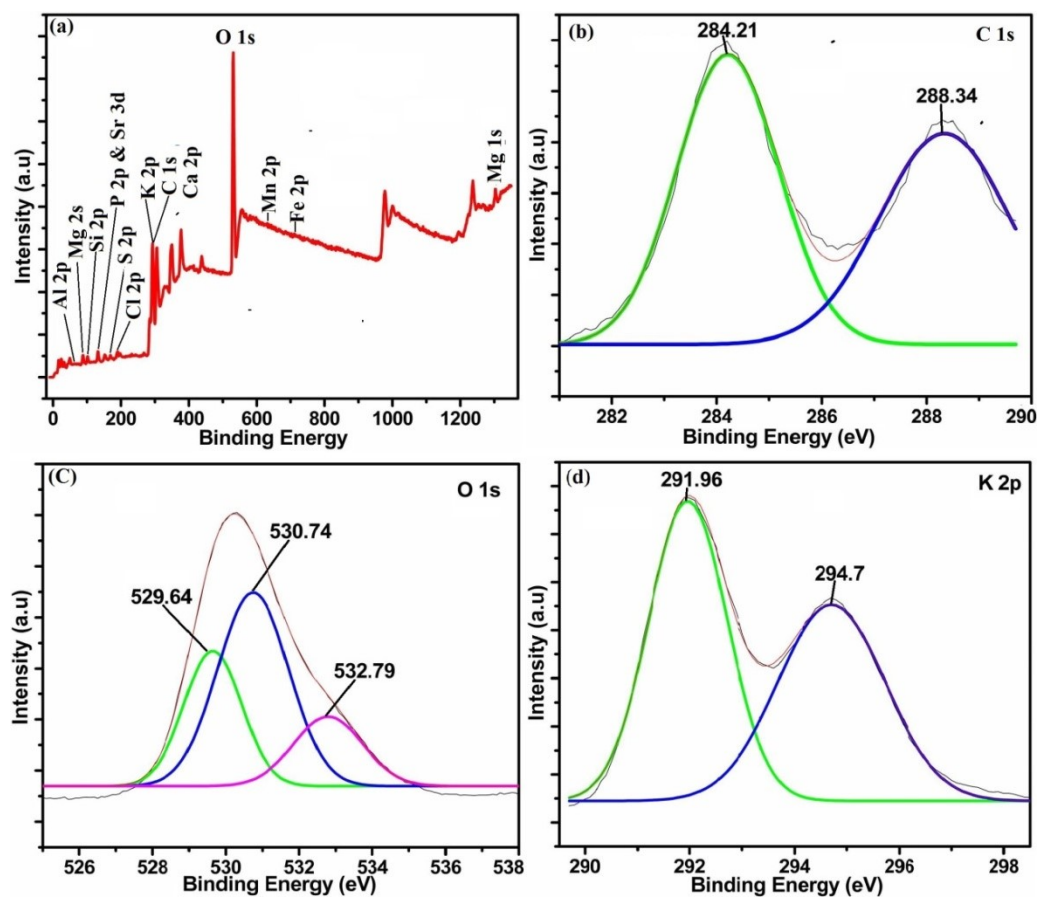

**Fig. S3:** XPS spectra of catalyst after 5<sup>th</sup> cycle (a) Survey (b) C 1s (c) O 1s and (d) K2p core level spectra

**Table S1:** Surface elements of reusable catalyst after  
5<sup>th</sup> cycle determined using XPS

| Element       | Wt%      | At%   |
|---------------|----------|-------|
| O1s           | 36.83    | 44.04 |
| K2p           | 13.79    | 6.75  |
| C 1s          | 18.69    | 29.8  |
| Mg1s          | 3.71     | 2.92  |
| Ca2p          | 10.95    | 5.23  |
| P2p           | 5.79     | 3.58  |
| Si2p          | 4.31     | 2.94  |
| S 2p          | 1.5      | 0.9   |
| Cl2p          | 0.14     | 0.08  |
| Al2p          | 0.55     | 0.39  |
| Cu(2p1 & 2p3) | 0.26     | 0.08  |
| Fe2p3         | 0.2      | 0.07  |
| Mn (2p1&2p3)  | 0.83     | 0.29  |
| Sr3d          | 2.381861 | 0.52  |

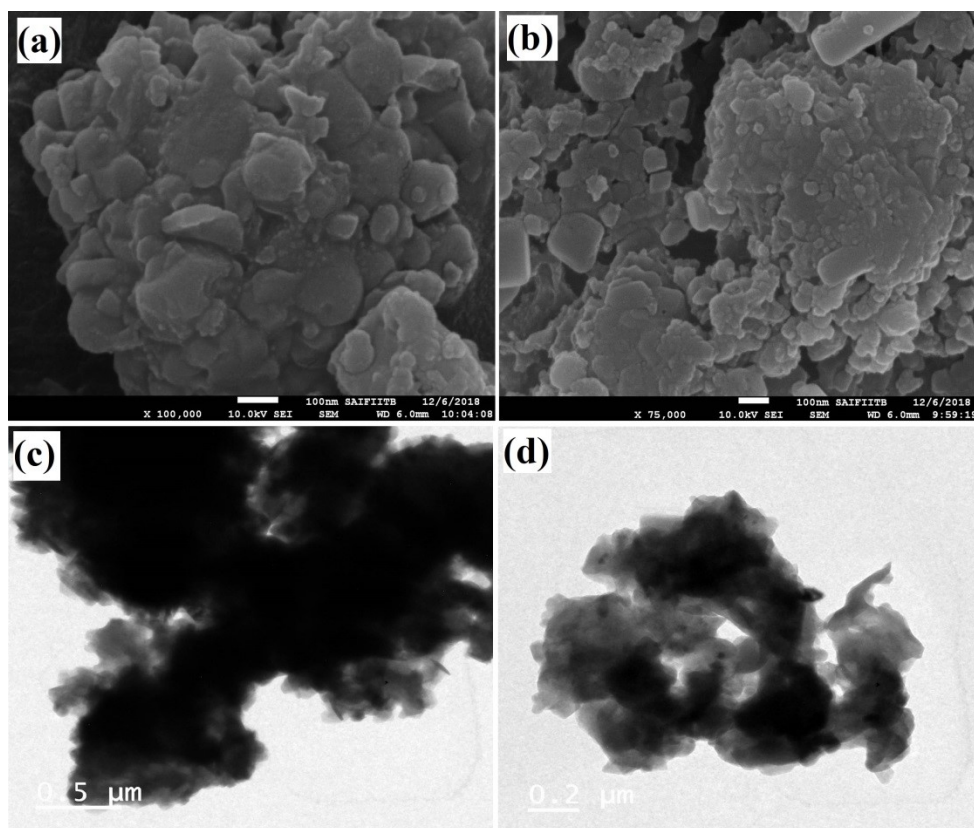

**Fig. S4:** (a-b) SEM images (c-d) TEM images of BFPA catalyst after 5<sup>th</sup> cycle

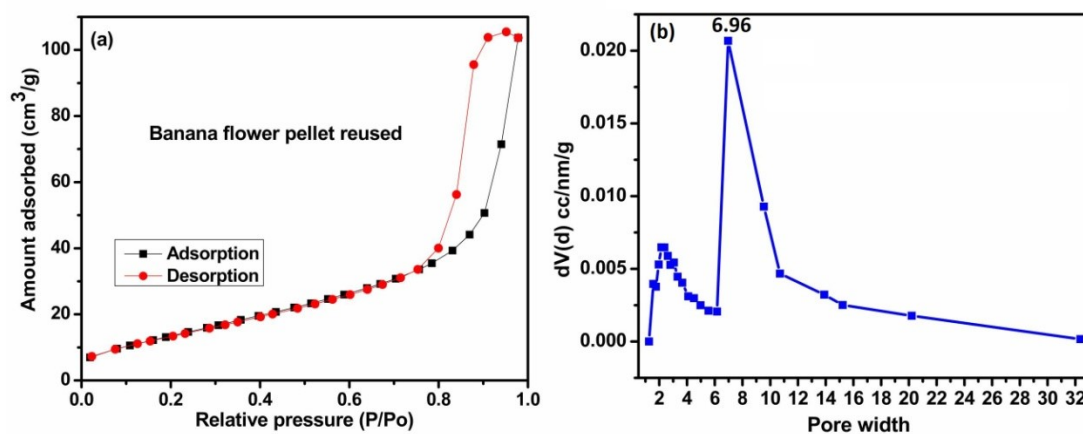

**Fig. S5:** BET results of reusable catalyst after 5<sup>th</sup> cycle (a)N<sub>2</sub> adsorption- desorption isotherm (b) pore size distribution
